# Supplementary material
Source: publisher figshare collection journal article supplement (https://asha.figshare.com/articles/dataset/_/24316996)
Supplement: Supplementary file 1 [file 1]

**Supplemental Material S2.** Full results of participants who responded to each question.

**Table S1.** Preferred Teaching Strategies for SLPs and SETs.

| Preferred Teaching Strategies                                | Mean<br>( <i>M</i> ) | Standard<br>Deviation<br>( <i>SD</i> ) |
|--------------------------------------------------------------|----------------------|----------------------------------------|
| <b><i>SLP 6-16 Preferred Teaching Strategies</i></b>         |                      |                                        |
| Created a treatment plan and/or treatment report             | 4.27                 | 1.0                                    |
| Observed instructor demonstrate activities and/or technology | 4.18                 | 1.0                                    |
| Problem-based learning activities (e.g., case studies)       | 4.18                 | 0.9                                    |
| Watching videos/film                                         | 4.02                 | 0.8                                    |
| Small-group discussion                                       | 3.91                 | 0.8                                    |
| Lecture                                                      | 3.89                 | 0.8                                    |
| Guest lectures from AAC vendors                              | 3.87                 | 1.0                                    |
| Large-group discussion                                       | 3.74                 | 0.8                                    |
| Resource (book/website/podcast/webinar) review               | 3.73                 | 0.9                                    |
| Reading outline/reflection                                   | 3.40                 | 0.8                                    |
| Research project/paper                                       | 3.27                 | 0.9                                    |
| <b><i>SET 6-16 Preferred Teaching Strategies</i></b>         |                      |                                        |
| Small-group discussion                                       | 4.11                 | 0.6                                    |
| Guest lectures from AAC vendors                              | 4.07                 | 0.8                                    |
| Created a treatment plan and/or treatment report             | 4.05                 | 1.0                                    |
| Created an assessment plan and/or assessment report          | 3.94                 | 1.0                                    |
| Created or programed a page or board                         | 3.91                 | 1.2                                    |
| Resource (book/website/podcast/webinar) review               | 3.86                 | 0.7                                    |
| Large-group discussion                                       | 3.83                 | 0.6                                    |
| Watching videos/film                                         | 3.81                 | 0.8                                    |
| Lecture                                                      | 3.65                 | 0.7                                    |
| Reading outline/reflection                                   | 3.53                 | 0.8                                    |
| Research project/paper                                       | 3.30                 | 0.9                                    |

*Note.* The top 6–16 preferred teaching strategies for SLPs and SETs ranked by mean. Standard deviations for number scale ratings are also provided. Ratings are based on a 5-point scale from 1 (*extremely unimportant*), to 5 (*extremely important*).

**Table S2.** Multidisciplinary Inclusion in AAC Courses.

| Multidisciplinary Inclusion                                                                                                        | SLP (%)          | SET (%)          |
|------------------------------------------------------------------------------------------------------------------------------------|------------------|------------------|
| <b><i>Dedicated AAC Course(s)</i></b>                                                                                              |                  |                  |
| <b>Incorporated students from other related disciplines (e.g., SPED, OT, PT).</b>                                                  | ( <i>n</i> = 45) | ( <i>n</i> = 61) |
| Yes                                                                                                                                | 13.3%            | *60.7%           |
| No                                                                                                                                 | *86.7%           | 39.3%            |
| <b>Rate how much you agree with the statement: It was beneficial incorporating multidisciplinary students in my AAC class(es).</b> | ( <i>n</i> = 6)  | ( <i>n</i> = 34) |
| Strongly disagree                                                                                                                  | 16.7%            | 11.8%            |
| Somewhat disagree                                                                                                                  | 0.0%             | 5.9%             |
| Neutral                                                                                                                            | 0.0%             | 5.9%             |
| Somewhat agree                                                                                                                     | *50.0%           | 32.4%            |
| Strongly agree                                                                                                                     | 33.3%            | *44.1%           |
| <b>Would you have liked multidisciplinary students to be included in AAC class(es)?</b>                                            | ( <i>n</i> = 38) | ( <i>n</i> = 22) |
| Yes                                                                                                                                | *78.9%           | *90.9%           |
| No                                                                                                                                 | 21.1%            | 9.1%             |

*Note.* SLP and SET responses for overall preference toward multidisciplinary inclusion in AAC courses. The number of SLPs and SETs completing this question is provided (*n*), alongside percent response for each answer item. Simple majority responses for SLPs and SETs are marked by \*. This majority response does not reflect statistical significance.

**Table 3.** Preferred Teaching Topics for SLPs and SETs.

| Preferred Teaching Topics                                           | Mean<br>( <i>M</i> ) | Standard<br>Deviation<br>( <i>SD</i> ) |
|---------------------------------------------------------------------|----------------------|----------------------------------------|
| <b><i>SLP 6-16 Preferred Teaching Topics</i></b>                    |                      |                                        |
| Special populations (e.g., autism, cerebral palsy)                  | 4.50                 | 0.8                                    |
| Working with families and/or other professionals                    | 4.50                 | 0.8                                    |
| Mobile applications (apps) and other software (options)             | 4.46                 | 0.8                                    |
| Measuring progress (i.e., data collection, measurement of outcomes) | 4.46                 | 0.7                                    |
| Goal writing (long- and short-term goals)                           | 4.45                 | 0.8                                    |
| Identifying a symbol selection method (e.g., switches, eye gaze)    | 4.43                 | 0.9                                    |
| Systems options and software programming (customization)            | 4.41                 | 0.9                                    |
| Positioning individuals for assessment and intervention             | 4.41                 | 0.7                                    |
| Mounting AAC system for the individual's optimal access             | 4.11                 | 0.8                                    |
| <b><i>SET 6-16 Preferred Teaching Topics</i></b>                    |                      |                                        |
| Vocabulary selection (e.g., core words, fringe words)               | 4.48                 | 0.6                                    |
| Identifying a symbol selection method (e.g., switches, eye gaze)    | 4.47                 | 0.6                                    |
| Evidence-based practice in AAC                                      | 4.44                 | 0.5                                    |
| Positioning individuals for assessment and intervention             | 4.35                 | 0.7                                    |
| Goal writing (long- and short-term goals)                           | 4.34                 | 0.7                                    |
| Mounting AAC system for the individual's optimal access             | 4.34                 | 0.7                                    |
| Mobile applications (apps) and other software (options)             | 4.33                 | 0.7                                    |
| Systems options and software programming (customization)            | 4.27                 | 0.7                                    |
| Symbol sets and organization                                        | 4.24                 | 0.7                                    |

*Note.* The top 6–14 preferred teaching topics for SLPs ranked by mean. Standard deviations for number scale ratings are also provided. Ratings are based on a 5-point scale from 1 (*extremely unimportant*), to 5 (*extremely important*).

**Table 4.** Self-Perceived Competencies Following Dedicated AAC Course(s).

|                                                                                                                                                                                                                       | SLP (%)          | SET (%)          |
|-----------------------------------------------------------------------------------------------------------------------------------------------------------------------------------------------------------------------|------------------|------------------|
| <b>Rate how much you agree with the statement: My AAC class(es) provided me with an adequate foundation to improve the communication skills of my students through the use of augmentative communication options.</b> | ( <i>n</i> = 44) | ( <i>n</i> = 56) |
| Strongly disagree                                                                                                                                                                                                     | 4.5%             | 7.1%             |
| Somewhat disagree                                                                                                                                                                                                     | 9.1%             | 10.7%            |
| Neutral                                                                                                                                                                                                               | 9.1%             | 28.6%            |
| Somewhat agree                                                                                                                                                                                                        | *50.0%           | *48.2%           |
| Strongly agree                                                                                                                                                                                                        | 27.3%            | 5.4%             |

*Note.* SLP and SET responses for self-perceived competencies immediately following dedicated AAC course(s). The number of SLPs and SETs completing this question is provided (*n*), alongside percent response for each answer item. Simple majority responses for SLPs and SETs are marked by \*. This majority response does not reflect statistical significance.
