# Supplementary material
Source: publisher figshare collection journal article supplement (https://asha.figshare.com/articles/dataset/_/24316996)
Supplement: Supplementary file 2 [file 1]

## **Supplemental Material S1. Survey questions.**

### **Background Information**

1. What is your age?
  - a. 18–24
  - b. 25–34
  - c. 35–44
  - d. 45–54
  - e. 55–64
  - f. 65 and older
2. What is your gender?
  - a. Female
  - b. Male
  - c. Other (please specify)
3. What is your ethnicity?
  - a. White
  - b. Black or African American
  - c. American Indian or Alaska Native
  - d. Asian
  - e. Native Hawaiian or Pacific Islander
  - f. Other (please specify)
4. What is your current occupation?
  - a. Speech-language pathologist (CCC-SLP) (displayed only on SLP survey form)
  - b. Special education teacher (displayed only on SET survey form)
  - c. Other (please specify)
5. What is the highest degree you have obtained?
  - a. Bachelor's degree
  - b. Master's degree
  - c. Clinical doctorate (SLPD) (displayed only on SLP survey form)
  - d. Professional doctorate (EdD) (displayed only on SET survey form)
  - e. Research doctorate (PhD)

### **Class or No Class**

6. Did you take one or more separate classes dedicated to the area of augmentative and alternative communication (AAC)?
  - a. Yes
  - b. No (skip to question 27)

### Preservice Training in AAC-Dedicated AAC Class

7. How many dedicated AAC classes have you taken?

- a. 1 class
- b. 2 classes
- c. 3 classes
- d. 4 or more classes

8. How long ago did you take your last dedicated AAC class?

- a. 0–2 years
- b. 3–5 years
- c. 6–10 years
- d. 11–15 years
- e. 16 or more years

9. At what level(s) did you take your dedicated AAC class(es)? Select all that apply.

- Undergraduate
- Master's
- Professional doctorate or PhD

## Course Content and Teaching Strategies

10. Please rate how helpful you think each of the following training activities were in terms of learning AAC technology and related content:

[illegible]

|                                                                          | Not<br>Applicable     | Extremely<br>unhelpful | Somewhat<br>unhelpful | Neutral               | Somewhat<br>helpful   | Extremely<br>helpful  |
|--------------------------------------------------------------------------|-----------------------|------------------------|-----------------------|-----------------------|-----------------------|-----------------------|
| Lecture                                                                  | <input type="radio"/> | <input type="radio"/>  | <input type="radio"/> | <input type="radio"/> | <input type="radio"/> | <input type="radio"/> |
| Problem-based learning<br>activities (e.g., case studies)                | <input type="radio"/> | <input type="radio"/>  | <input type="radio"/> | <input type="radio"/> | <input type="radio"/> | <input type="radio"/> |
| Small-group discussion                                                   | <input type="radio"/> | <input type="radio"/>  | <input type="radio"/> | <input type="radio"/> | <input type="radio"/> | <input type="radio"/> |
| Large-group discussion                                                   | <input type="radio"/> | <input type="radio"/>  | <input type="radio"/> | <input type="radio"/> | <input type="radio"/> | <input type="radio"/> |
| Research project/paper                                                   | <input type="radio"/> | <input type="radio"/>  | <input type="radio"/> | <input type="radio"/> | <input type="radio"/> | <input type="radio"/> |
| Reading outline/reflection                                               | <input type="radio"/> | <input type="radio"/>  | <input type="radio"/> | <input type="radio"/> | <input type="radio"/> | <input type="radio"/> |
|                                                                          | Not<br>Applicable     | Extremely<br>unhelpful | Somewhat<br>unhelpful | Neutral               | Somewhat<br>helpful   | Extremely<br>helpful  |
| Resource<br>(book/website/podcast/webinar)<br>review                     | <input type="radio"/> | <input type="radio"/>  | <input type="radio"/> | <input type="radio"/> | <input type="radio"/> | <input type="radio"/> |
| Guest lectures from AAC<br>vendors                                       | <input type="radio"/> | <input type="radio"/>  | <input type="radio"/> | <input type="radio"/> | <input type="radio"/> | <input type="radio"/> |
| Guest lectures from individuals<br>or caregivers of those who use<br>AAC | <input type="radio"/> | <input type="radio"/>  | <input type="radio"/> | <input type="radio"/> | <input type="radio"/> | <input type="radio"/> |
| Watching videos/film                                                     | <input type="radio"/> | <input type="radio"/>  | <input type="radio"/> | <input type="radio"/> | <input type="radio"/> | <input type="radio"/> |

11. Please rate the degree to which you agree or disagree with each of the following statements related to AAC classes:

|                                                                                                                                                                    | Strongly<br>disagree  | Somewhat<br>disagree  | Neutral               | Somewhat<br>agree     | Strongly<br>agree     |
|--------------------------------------------------------------------------------------------------------------------------------------------------------------------|-----------------------|-----------------------|-----------------------|-----------------------|-----------------------|
| I prefer classes that incorporate a large number of opportunities for active (e.g., problem-based learning, case studies, group activities) and hands-on learning. | <input type="radio"/> |
| I prefer classes that primarily incorporate passive (e.g., lecture style-based learning) learning.                                                                 | <input type="radio"/> |
| I prefer classes that primarily incorporate a mix of passive and active learning.                                                                                  | <input type="radio"/> |

12. Please rate how important it was to include each of the following topics in your AAC preservice training:

|                                                                     | Not applicable        | Extremely unimportant | Somewhat unimportant  | Neutral               | Somewhat important    | Extremely important   |
|---------------------------------------------------------------------|-----------------------|-----------------------|-----------------------|-----------------------|-----------------------|-----------------------|
| Systems options and software programming (customization)            | <input type="radio"/> |
| Identifying a symbol selection method (e.g., switches, eye gaze)    | <input type="radio"/> |
| Mounting AAC system for the individual's optimal access             | <input type="radio"/> |
| Vocabulary selection (e.g., core words, fringe words)               | <input type="radio"/> |
| Training individuals to use his/her system                          | <input type="radio"/> |
|                                                                     | Not applicable        | Extremely unimportant | Somewhat unimportant  | Neutral               | Somewhat important    | Extremely important   |
| Special populations (e.g., autism, cerebral palsy)                  | <input type="radio"/> |
| Evidence-based practice in AAC                                      | <input type="radio"/> |
| Measuring progress (i.e., data collection, measurement of outcomes) | <input type="radio"/> |
| Working with families and/or other professionals                    | <input type="radio"/> |

13. Did your AAC class(es) incorporate students from other related disciplines (e.g., SPED (only on SLP survey), SLP (only on SPED survey), OT, PT)?

- a. Yes
- b. No (skips to question 15)

14. Please rate how much you agree with the following statement:

It was beneficial incorporating multidisciplinary students in my AAC class(es)?

- a. Strongly disagree
- b. Somewhat disagree
- c. Neutral

d. Somewhat agree

e. Strongly agree

15. Would you have liked multidisciplinary students to be included in your AAC class(es)?

a. Yes

b. No

16. Please rate the degree to which you agree or disagree with the following statement related to your AAC class(es):

My AAC class(es) provided me with an adequate foundation to improve the communication skills of my students through the use of augmentative communication options.

a. Strongly disagree

b. Somewhat disagree

c. Neutral

d. Somewhat agree

e. Strongly agree

17. Please rate how competent you felt in providing AAC services to students in the following areas immediately following the completion of your AAC class(es):

|                                                 | Extremely<br>incompetent | Somewhat<br>incompetent | Neutral               | Somewhat<br>competent | Extremely<br>competent |
|-------------------------------------------------|--------------------------|-------------------------|-----------------------|-----------------------|------------------------|
| Students with motor<br>impairment               | <input type="radio"/>    | <input type="radio"/>   | <input type="radio"/> | <input type="radio"/> | <input type="radio"/>  |
| Students with cognitive<br>impairment           | <input type="radio"/>    | <input type="radio"/>   | <input type="radio"/> | <input type="radio"/> | <input type="radio"/>  |
| Students with visual<br>impairment              | <input type="radio"/>    | <input type="radio"/>   | <input type="radio"/> | <input type="radio"/> | <input type="radio"/>  |
| Students with auditory<br>impairment            | <input type="radio"/>    | <input type="radio"/>   | <input type="radio"/> | <input type="radio"/> | <input type="radio"/>  |
| Students with autism<br>spectrum disorder (ASD) | <input type="radio"/>    | <input type="radio"/>   | <input type="radio"/> | <input type="radio"/> | <input type="radio"/>  |

18. Please rate how competent you felt using the following AAC devices immediately following the completion of your AAC class(es):

|                                                                                                                                                                                                                                                                                     | Extremely<br>uncompetent | Somewhat<br>uncompetent | Neutral               | Somewhat<br>competent | Extremely<br>competent |
|-------------------------------------------------------------------------------------------------------------------------------------------------------------------------------------------------------------------------------------------------------------------------------------|--------------------------|-------------------------|-----------------------|-----------------------|------------------------|
| Unaided: no technology required (e.g., gestures, manual signs, facial expressions, vocalizations, verbalizations, body language)                                                                                                                                                    | <input type="radio"/>    | <input type="radio"/>   | <input type="radio"/> | <input type="radio"/> | <input type="radio"/>  |
| Aided: low-/light-tech (e.g., pictures, objects, photographs, writing, communication boards/books)                                                                                                                                                                                  | <input type="radio"/>    | <input type="radio"/>   | <input type="radio"/> | <input type="radio"/> | <input type="radio"/>  |
| Aided: high-tech (e.g., speech-generating devices; single-message devices and recordable/digitized devices; AAC software that enables dynamic symbol/language representation and that is used with some form of technology hardware, including computers, tablets, and smartphones) | <input type="radio"/>    | <input type="radio"/>   | <input type="radio"/> | <input type="radio"/> | <input type="radio"/>  |

### AAC Practice

19. Do you work with students who use AAC?

- a. Yes
- b. No

20. How long have you worked with students who use AAC?

- a. 0–2 years
- b. 3–5 years
- c. 6–10 years
- d. 11–15 years
- e. 16+ years

### No Dedicated AAC Course

21. Was AAC content included in other classes during your preservice training?

- a. Yes
- b. No

22. How long ago did you take the other course(s) that included AAC content?

- a. 0–2 years
- b. 3–5 years
- c. 6–10 years
- d. 11–15 years
- e. 16 or more years

23. Please rate the degree to which you agree or disagree with each of the following statements related to AAC classes:

|                                                                                                                                                                    | Strongly disagree     | Somewhat disagree     | Neutral               | Somewhat agree        | Strongly agree        |
|--------------------------------------------------------------------------------------------------------------------------------------------------------------------|-----------------------|-----------------------|-----------------------|-----------------------|-----------------------|
| I prefer classes that incorporate a large number of opportunities for active (e.g., problem-based learning, case studies, group activities) and hands-on learning. | <input type="radio"/> |
| I prefer classes that primarily incorporate passive (e.g., lecture style-based learning) learning.                                                                 | <input type="radio"/> |
| I prefer classes that primarily incorporate a mix of passive and active learning.                                                                                  | <input type="radio"/> |

24. Please rate the degree to which you agree or disagree with the following statement related to AAC class(es):

Incorporating multidisciplinary students in AAC class(es) is important.

- a. Strongly disagree
- b. Somewhat disagree
- c. Neutral
- d. Somewhat agree
- e. Strongly disagree
